# Supplementary material for: Defining Levels of US Hospitals’ Pediatric Capabilities
Source: PubMed Central journal article supplement (PMC11250363; doi:10.1001/jamanetworkopen.2024.22196), 2024-07-15

## Supplementary Online Content

Michelson KA, Alpern ER, Remick KE, et al. Defining levels of US hospitals' pediatric capabilities. *JAMA Netw Open*. 2024;7(7):e2422196.

doi:10.1001/jamanetworkopen.2024.22196

**eTable.** Pediatric Capability Definitions

**eFigure 1.** Utilization of Pediatric Resources by Hospitals in Each Pediatric Level

**eFigure 2.** Classification of Hospitals Into Functional Levels in the Main Analysis and in Two Sensitivity Analyses

This supplementary material has been provided by the authors to give readers additional information about their work.

**eTable. Pediatric Capability Definitions**

Codes ending in \* indicate any code beginning with the given stem. In general, CPT codes only appear in patients discharged from the ED, so CPT codes were not given for surgeries routinely done for inpatients.

| Capability                               | System       | Codes                                                                                                                                                                                                                                                                                                                                                                                    |
|------------------------------------------|--------------|------------------------------------------------------------------------------------------------------------------------------------------------------------------------------------------------------------------------------------------------------------------------------------------------------------------------------------------------------------------------------------------|
| Appendectomy                             | ICD-10-PCS   | 0DBJ0ZX, 0DBJ0ZZ, 0DBJ3ZX, 0DBJ3ZZ, 0DBJ4ZX, 0DBJ4ZZ, 0DBJ7ZX, 0DBJ7ZZ, 0DBJ8ZX, 0DBJ8ZZ, 0DTJ0ZZ, 0DTJ4ZZ, 0DTJ7ZZ, 0DTJ8ZZ                                                                                                                                                                                                                                                             |
|                                          | CPT          | 44950, 44960, 44970                                                                                                                                                                                                                                                                                                                                                                      |
| Asthma hospitalization                   | CCS refined  | J45*                                                                                                                                                                                                                                                                                                                                                                                     |
| Cystic fibrosis hospitalization          | ICD-10-CM    | E84*                                                                                                                                                                                                                                                                                                                                                                                     |
| Congenital heart disease hospitalization | ICD-10-CM    | Q213*, Q220*, Q234*                                                                                                                                                                                                                                                                                                                                                                      |
| Chemotherapy hospitalization             | ICD-10-CM    | Z511*                                                                                                                                                                                                                                                                                                                                                                                    |
| CT scan                                  | CCS          | 177, 178, 179, 180                                                                                                                                                                                                                                                                                                                                                                       |
|                                          | CPT          | 70450, 70460, 70470, 70480, 70481, 70482, 70486, 70487, 70488, 70490, 70491, 70492, 70496, 70498, 71250, 71260, 71270, 71271, 71275, 72125, 72126, 72127, 72128, 72129, 72130, 72131, 72132, 72133, 72191, 72192, 72193, 72194, 73200, 73201, 73202, 73206, 73700, 73701, 73702, 73706, 74150, 74160, 74170, 74174, 74175, 74176, 74177, 74178, 7426*                                    |
|                                          | Revenue code | 350, 351, 352, 359                                                                                                                                                                                                                                                                                                                                                                       |
| Dialysis                                 | ICD-10-PCS   | 3E1M39Z, 5A1D00Z, 5A1D60Z, 5A1D70Z, 5A1D80Z, 5A1D90Z                                                                                                                                                                                                                                                                                                                                     |
| Diabetic ketoacidosis hospitalization    | ICD-10-CM    | E101, E1010, E1011, E111, E1110, E1111, E131, E1310, E1311                                                                                                                                                                                                                                                                                                                               |
| ECMO                                     | ICD-10-PCS   | 5A1522F, 5A1522G, 5A1522H                                                                                                                                                                                                                                                                                                                                                                |
|                                          | CPT          | 33946, 33947, 33948, 33949, 33951, 33952, 33953, 33954, 33955, 33956, 33957, 33958, 33959, 33962, 33963, 33964, 33966                                                                                                                                                                                                                                                                    |
| Endoscopy                                | ICD-10-PCS   | 0DB18ZX, 0DB18ZZ, 0DB28ZX, 0DB28ZZ, 0DB38ZX, 0DB38ZZ, 0DB48ZX, 0DB48ZZ, 0DB58ZX, 0DB58ZZ, 0DB68ZX, 0DB68ZZ, 0DB78ZX, 0DB78ZZ, 0DB88ZX, 0DB88ZZ, 0DB98ZX, 0DB98ZZ, 0DBA8ZX, 0DBA8ZZ, 0DBB8ZX, 0DBB8ZZ, 0DBC8ZX, 0DBC8ZZ, 0DBE8ZX, 0DBE8ZZ, 0DBF8ZX, 0DBF8ZZ, 0DBG8ZX, 0DBG8ZZ, 0DBH8ZX, 0DBH8ZZ, 0DBJ8ZX, 0DBJ8ZZ, 0DBK8ZX, 0DBK8ZZ, 0DBL8ZX, 0DBL8ZZ, 0DBM8ZX, 0DBM8ZZ, 0DBN8ZX, 0DBN8ZZ |
|                                          | CPT          | 43231, 43232, 43233, 43235, 43236, 43237, 43238, 43239, 43240, 43241, 43242, 43243, 43244, 43245, 43246, 43247, 43248, 43249, 43235, 43236, 43237, 43238, 43239, 43250, 43251, 43252, 45378, 45379,                                                                                                                                                                                      |

|                                            |             |                                                                                                                                                                                                                                                                                                                                                                                                            |
|--------------------------------------------|-------------|------------------------------------------------------------------------------------------------------------------------------------------------------------------------------------------------------------------------------------------------------------------------------------------------------------------------------------------------------------------------------------------------------------|
|                                            |             | 45380, 45381, 45382, 45384, 45385, 45386, 45388, 45389, 45390, 45391, 45392, 45393, 45395, 45397, 45398                                                                                                                                                                                                                                                                                                    |
| Fontan surgery                             | ICD-10-PCS  | 061007P, 061007Q, 061007R, 061009P, 061009Q, 061009R, 06100AP, 06100AQ, 06100AR, 06100JP, 06100JQ, 06100JR, 06100KP, 06100KQ, 06100KR, 06100ZP, 06100ZQ, 06100ZR                                                                                                                                                                                                                                           |
| Gastrostomy                                | CCS         | 71                                                                                                                                                                                                                                                                                                                                                                                                         |
| Inflammatory bowel disease hospitalization | ICD-10-CM   | K50*, K51*                                                                                                                                                                                                                                                                                                                                                                                                 |
| Simple laceration repair                   | CPT         | 12001, 12002, 12004, 12005, 12006, 12007, 12011, 12013, 12014, 12015, 12016, 12017, 12018, 12020, 12021                                                                                                                                                                                                                                                                                                    |
|                                            | ICD-10-PCS  | 0JQ00ZZ, 0JQ03ZZ, 0JQ10ZZ, 0JQ13ZZ, 0JQ40ZZ, 0JQ43ZZ, 0JQ50ZZ, 0JQ53ZZ, 0JQ60ZZ, 0JQ63ZZ, 0JQ70ZZ, 0JQ73ZZ, 0JQ80ZZ, 0JQ83ZZ, 0JQ90ZZ, 0JQ93ZZ, 0JQB0ZZ, 0JQB3ZZ, 0JQC0ZZ, 0JQC3ZZ, 0JQD0ZZ, 0JQD3ZZ, 0JQF0ZZ, 0JQF3ZZ, 0JQG0ZZ, 0JQG3ZZ, 0JQH0ZZ, 0JQH3ZZ, 0JQJ0ZZ, 0JQJ3ZZ, 0JQK0ZZ, 0JQK3ZZ, 0JQL0ZZ, 0JQL3ZZ, 0JQM0ZZ, 0JQM3ZZ, 0JQN0ZZ, 0JQN3ZZ, 0JQP0ZZ, 0JQP3ZZ, 0JQQ0ZZ, 0JQQ3ZZ, 0JQR0ZZ, 0JQR3ZZ |
| Lumbar puncture                            | ICD-10-PCS  | 009U3ZX, 009U3ZZ                                                                                                                                                                                                                                                                                                                                                                                           |
|                                            | CPT         | 62270                                                                                                                                                                                                                                                                                                                                                                                                      |
| Mechanical ventilation                     | ICD-10-PCS  | 5A1935Z, 5A1945Z, 5A1955Z                                                                                                                                                                                                                                                                                                                                                                                  |
|                                            | CPT         | 94002, 94003, 94004, 94005                                                                                                                                                                                                                                                                                                                                                                                 |
| Pneumonia hospitalization                  | CCS refined | J13*, J14*, J15*, J16*, J17*, J18*                                                                                                                                                                                                                                                                                                                                                                         |
| Urea cycle defect hospitalization          | ICD-10-CM   | E722*                                                                                                                                                                                                                                                                                                                                                                                                      |
| Closed reduction of radius                 | ICD-10-PCS  | 0PSHXZZ, 0PSJXZZ                                                                                                                                                                                                                                                                                                                                                                                           |
|                                            | CPT         | 25560, 25565, 25574, 25575, 25600, 25605, 25606, 25607, 25608, 25609                                                                                                                                                                                                                                                                                                                                       |
| Sickle cell anemia hospitalization         | ICD-10-CM   | D57*                                                                                                                                                                                                                                                                                                                                                                                                       |
| Organ transplant                           | CCS         | 105, 176                                                                                                                                                                                                                                                                                                                                                                                                   |
| Cerebral ventricular shunt                 | ICD-10-PCS  | 009600Z, 009630Z, 009640Z                                                                                                                                                                                                                                                                                                                                                                                  |
| Ventricular septal defect surgery          | ICD-10-PCS  | 02QM*                                                                                                                                                                                                                                                                                                                                                                                                      |

\* Chosen to represent complex congenital heart disease: hypoplastic left heart, pulmonary atresia, and tetralogy of Fallot only

**eFigure 1.** Utilization of Pediatric Resources by Hospitals in Each Pediatric Level

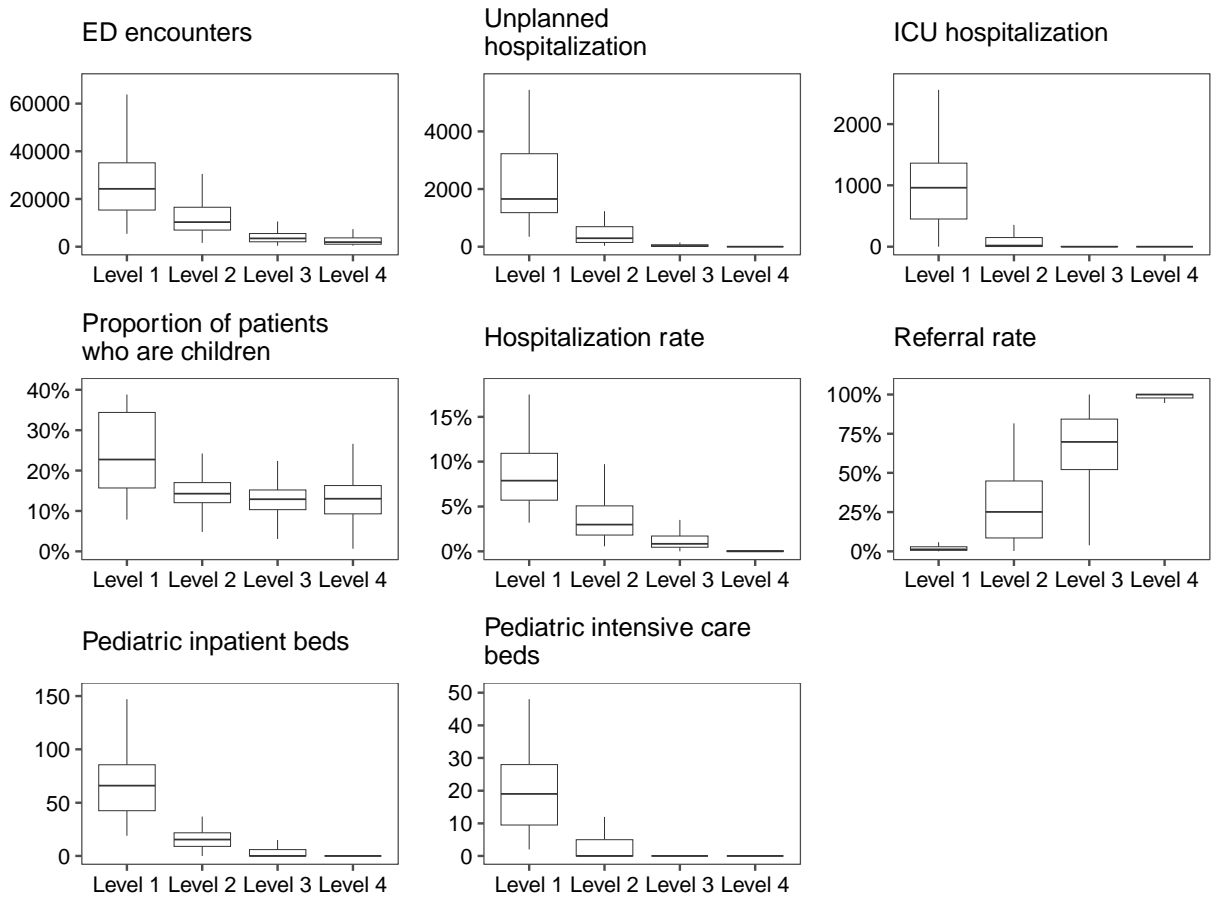

**eFigure 2.** Classification of Hospitals Into Functional Levels in the Main Analysis and in Two Sensitivity Analyses  
 Percentages of the hospitals in each level are shown in the heat map (blue: ≥75%, green: 50 to <75%, yellow: 25 to <50%, orange: >0 to <25%, white: 0%).

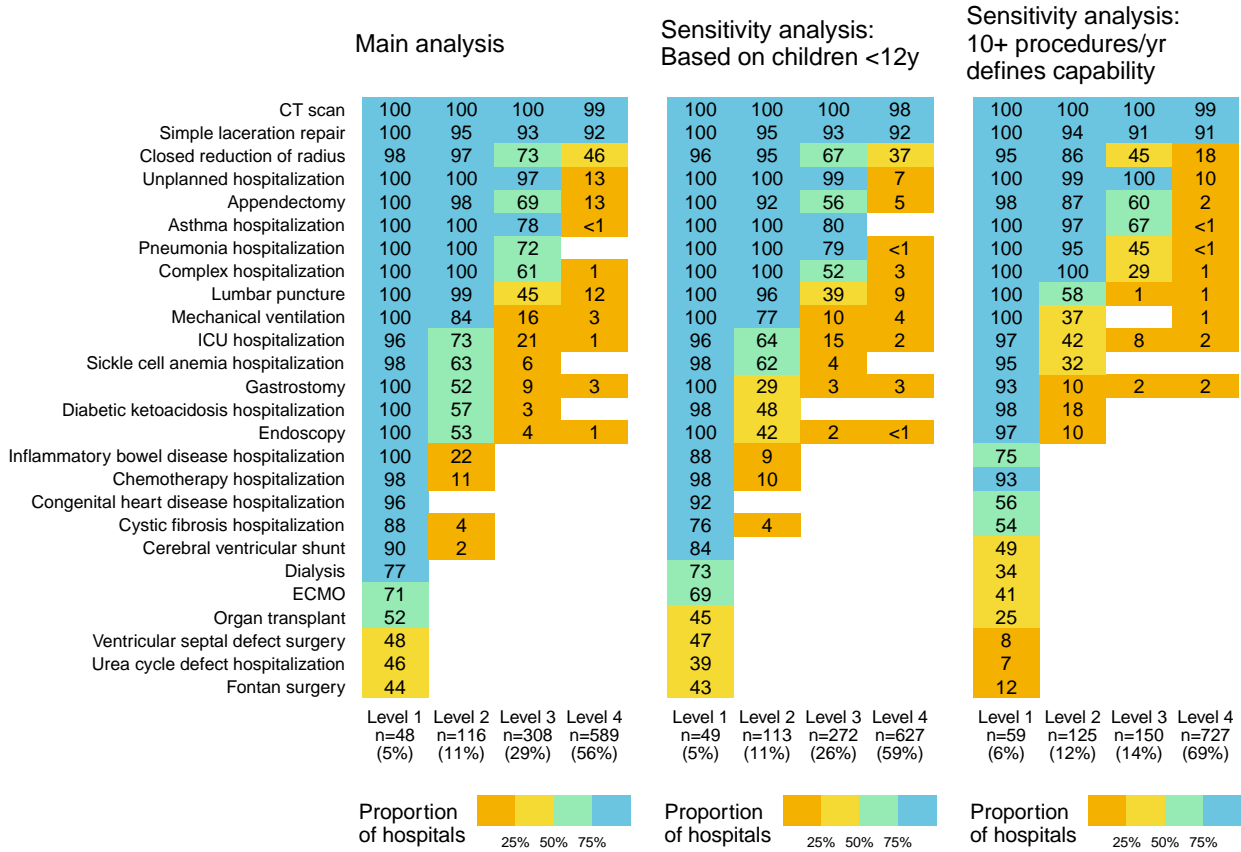

Supplement: jamanetwopen-e2422196-s001.pdf [file jamanetwopen-e2422196-s001.pdf]
