# Supplementary material for: Defining Levels of US Hospitals’ Pediatric Capabilities
Source: PubMed Central journal article supplement (PMC11250363; doi:10.1001/jamanetworkopen.2024.22196), 2024-07-15
Supplement: jamanetwopen-e2422196-s002.pdf [file jamanetwopen-e2422196-s002.pdf]

## Data Sharing Statement

Michelson. Defining Levels of US Hospitals' Pediatric Capabilities. *JAMA Netw Open*.  
Published July 15, 2024. doi:10.1001/jamanetworkopen.2024.22196

### Data

**Data available:** No

### Additional Information

**Explanation for why data not available:** The data are available for purchase from the Healthcare Cost and Utilization Project
